# Supplementary material for: Significant Mobility of Novel Heteroaggregates of Montmorillonite Microparticles with Nanoscale Zerovalent Irons in Saturated Porous Media
Source: Toxics. 2022 Jun 17;10(6):332. doi: 10.3390/toxics10060332 (PMC9227587; doi:10.3390/toxics10060332)
Supplement: Supplementary file 1 [file toxics-10-00332-s001.zip › toxics-1694723-supplementary.pdf]

# Supplementary Materials: Significant Mobility of Novel Heteroaggregates of Montmorillonite Microparticles with Nanoscale Zerovalent Irons in Saturated Porous Media

Chongyang Shen, Jinan Teng, Wenjuan Zheng, Dong Liu and Ke Ma

**Table S1.** Sizes and zeta potentials of Mt, nZVI, Mt-nZVI, and sand collectors at different ISs. The values of FZM were  $0.66 \text{ g g}^{-1}$ ,  $0.33 \text{ g g}^{-1}$ ,  $0.165 \text{ g g}^{-1}$ , and  $0.0825 \text{ g g}^{-1}$  for A, B, C, and D, respectively.

| IS<br>(M) | Particle size (nm) |      |         |      |      |      |       | Zeta potential (mV) |      |         |       |       |       |  |
|-----------|--------------------|------|---------|------|------|------|-------|---------------------|------|---------|-------|-------|-------|--|
|           | Mt                 | nZVI | Mt-nZVI |      |      |      | Sand  | Mt                  | nZVI | Mt-nZVI |       |       |       |  |
|           |                    |      | A       | B    | C    | D    |       |                     |      | A       | B     | C     | D     |  |
| 0.001     | 965                | 1210 | 1652    | 1542 | 1376 | 1210 | -45.5 | -31.1               | 19   | -30.3   | -33.2 | -34.4 | -36.8 |  |
| 0.01      | 1256               | 3080 | 2427    | 2213 | 2185 | 1878 | -36.5 | -29.5               | 9.8  | -28.3   | -30.5 | -31.5 | -34.6 |  |
| 0.1       | 1689               | 4350 | 3003    | 2654 | 2497 | 2054 | -26.8 | -17.2               | 4.7  | -24.1   | -28.2 | -28.8 | -29.4 |  |
| 0.2       | 2218               | 7360 | 3163    | 3027 | 2930 | 2624 | -22   | -6.7                | 2.7  | -22.1   | -25.3 | -25.4 | -27.3 |  |

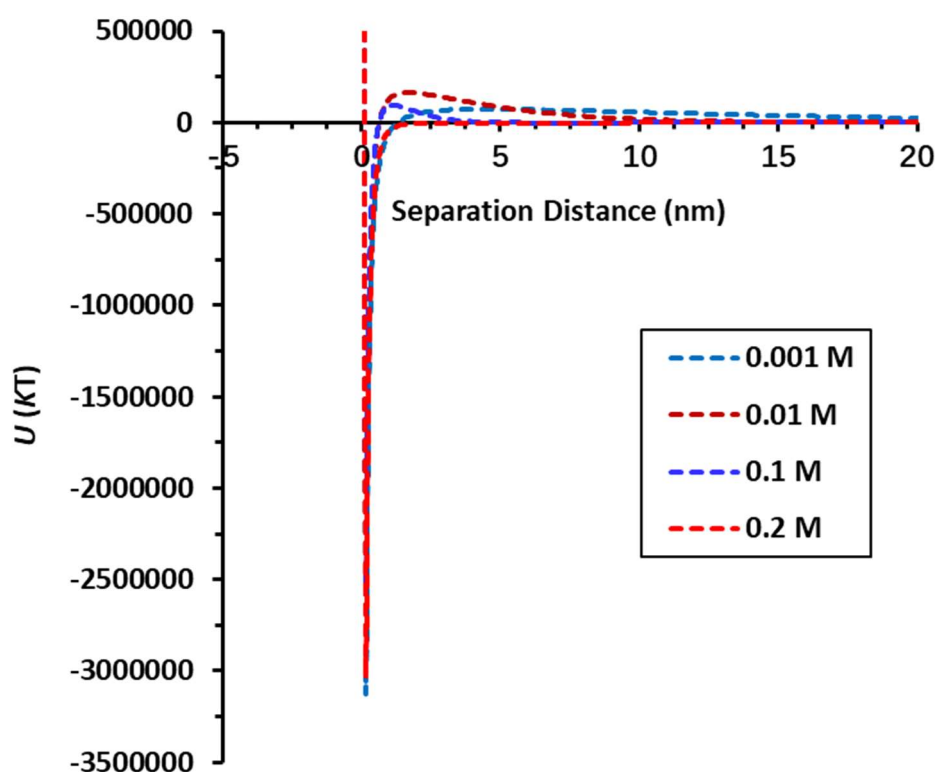

**Figure S1.** DLVO interaction energy profiles between a Mt cuboid particle and a planar sand surface at different solution ISs.  $k$  is Boltzmann constant and  $T$  is absolute temperature.

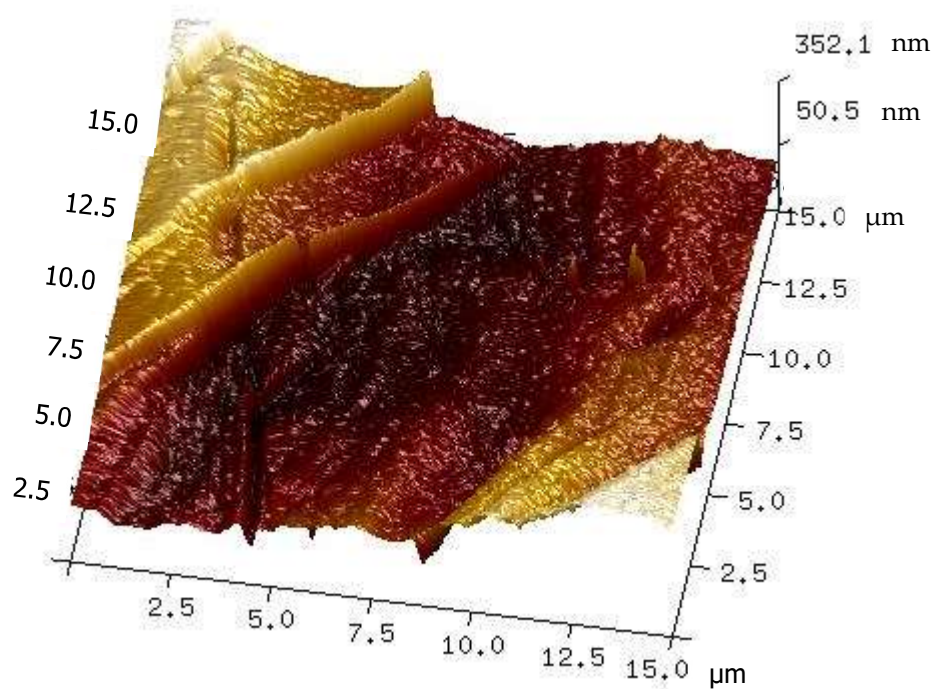

Figure S2. A typical AFM image of sand surface.

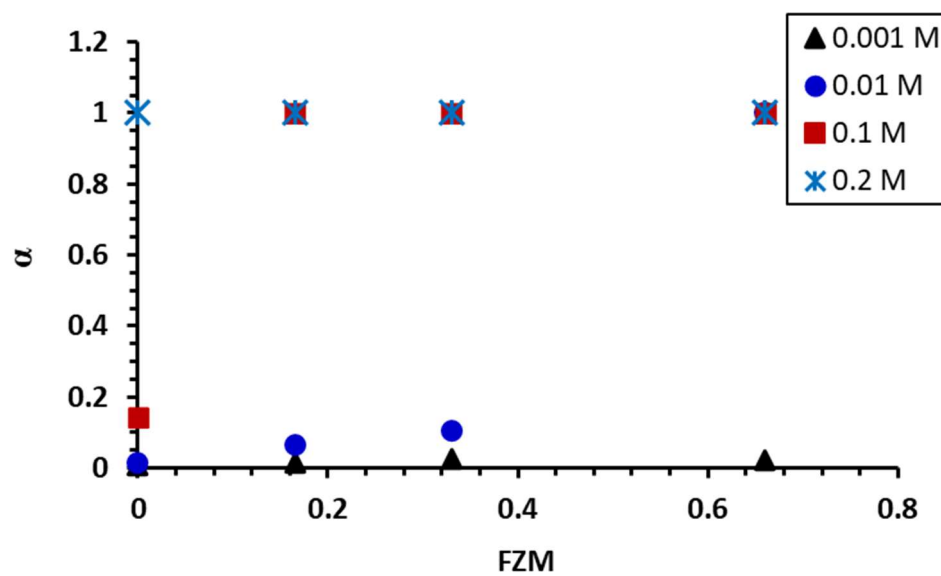

Figure S3. Calculated values of attachment efficiency  $\alpha$  as a function of FZM at different solution ISs using the BTCs in Figure 4.

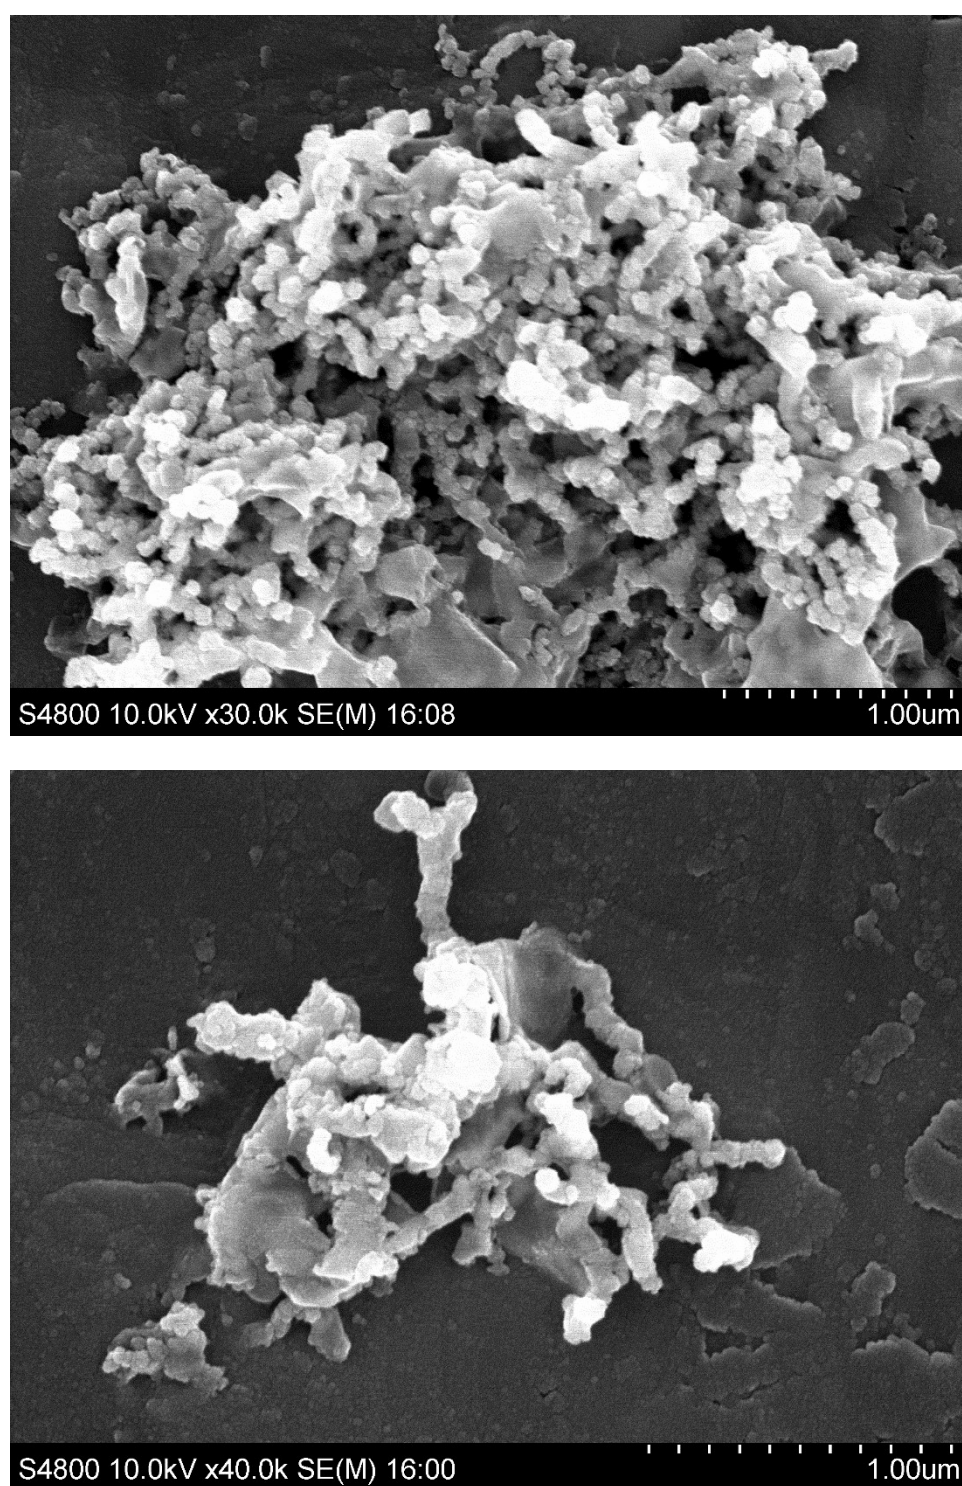

**Figure S4.** SEM images of the particles in the effluents for column experiments with injection of mixture of Mt suspension and nZVI aggregate suspension.
